# Supplementary material
Source: PubMed Central journal article supplement (PMC5712264)
Supplement: NIHMS915912-supplement-2.pdf [file NIHMS915912-supplement-2.pdf]

## Supplemental Information

### **Intratumoral injections of chimeric antigen receptor (CAR) T cells directed against c-Met are safe and induce tumor necrosis and inflammatory responses in metastatic breast cancer**

Julia Tchou<sup>1,2</sup>, Yangbing Zhao<sup>3,4</sup>, Bruce L Levine<sup>3,4</sup>, Paul J Zhang<sup>3</sup>, Megan M Davis<sup>4</sup>, Jan Joseph Melenhorst<sup>3,4</sup>, Irina Kulikovskaya<sup>4</sup>, Andrea L Brennan<sup>4</sup>, Xiaojun Liu<sup>4</sup>, Simon F Lacey<sup>4</sup>, Avery Posey<sup>1,3,4</sup>, Austin D Williams<sup>1,2</sup>, Alycia So<sup>1,2</sup>, Jose R Conejo-Garcia<sup>7</sup>, Gabriela Plesa<sup>4</sup>, Regina M. Young<sup>4</sup>, Shannon McGettigan<sup>4</sup>, Jean Campbell<sup>8</sup>, Robert Pierce<sup>8</sup>, Jennifer M Matro<sup>1,5</sup>, Angela M DeMichele<sup>1,5</sup>, Amy S Clark<sup>1,5</sup>, Laurence J Cooper<sup>6</sup>, Lynn M. Schuchter<sup>1,5</sup>, Robert H Vonderheide<sup>1,5</sup>, and Carl H June<sup>1,3,4</sup>

1. Abramson Cancer Center, Perelman School of Medicine, University of Pennsylvania, Philadelphia, PA, USA.
2. Department of Surgery, Perelman School of Medicine, University of Pennsylvania, Philadelphia, PA
3. Department of Pathology and Laboratory Medicine, Perelman School of Medicine, University of Pennsylvania, Philadelphia, PA.
4. Center for Cellular Immunotherapies, Perelman School of Medicine, University of Pennsylvania, Philadelphia, PA.
5. Hematology-Oncology Division, Department of Medicine, Perelman School of Medicine, University of Pennsylvania, PA.
6. Division of Pediatrics, The University of Texas MD Anderson Cancer Center, Houston, TX, USA.
7. Department of Immunology, H. Lee Moffitt Cancer Center and Research Institute, Tampa, FL, USA.
8. Experimental Pathology, Program in Immunology, Fred Hutchinson Cancer Research Center, Seattle, WA, USA.

#### **Correspondence**

Julia Tchou 3400 Civic Center Boulevard, Perelman Center for Advanced Medicine, South Pavilion 10-180, Philadelphia PA 19104. Phone: 215-615-7575; Fax: 215-615-0555; email ([Julia.Tchou@uphs.upenn.edu](mailto:Julia.Tchou@uphs.upenn.edu))

or Carl June 3400 Civic Center Boulevard, Building 421, Philadelphia, PA 19104-5156. Phone: 215-573-3269; Fax: 610-646-8455; email ([cjune@upenn.edu](mailto:cjune@upenn.edu))

## Supplemental Materials

### Supplementary Figure Legends

**Fig. S1. Clinical trial schema.** Design of a phase 0 clinical trial (NCT01837602) to evaluate the safety and feasibility of intratumoral injection with mRNA c-Met-CAR T cells in patients with metastatic breast cancer.

**Fig S2. Representative immunohistochemistry (IHC).** Two breast cancer tumor samples displaying intratumoral heterogeneity in intensity and proportion of tumor cells demonstrating membrane staining of c-Met on IHC. A) 1+ 30% c-Met positive breast cancer. Note: about 30% of tumor cells had membranous c-Met staining while remaining tumor cells had background c-Met staining; and B) 3+ 90% c-Met positive breast cancer. Note: the majority of tumor cells were strongly (3+) c-Met+ while stromal cells were c-Met negative.

**Fig. S3. Histology and IHC of tumor tissue pre and post intratumoral injection of RNA CAR T c-Met from one patient.** Histologic (H&E) and IHC evaluation of c-Met expression and T cell (CD3, CD4, CD8) and macrophage (CD68) infiltration in tumor tissues of pre-treatment, away from intratumoral injection site and at intratumoral injection site.

**Fig. S4. Histology and IHC of tumor tissue pre and post intratumoral injection with lidocaine (1 mL) and RNA CAR T c-Met (1 mL) from another patient.** Histologic (H&E) and IHC evaluation of c-Met expression and T cell (CD3, CD4, CD8) and macrophage (CD68) infiltration in tumor tissues of pre-treatment, intratumoral injection of lidocaine site and intratumoral injection of mRNA c-Met-CAR T cells.

**Fig. S5. Characterization of CD68+ tumor infiltrated immune cells using multiplex IHC analyses as described (1) in pre and post IT injection of RNA CAR T c-Met tumor tissue sections from two patients.** The percentages of immune cells staining positive for the following markers (CD66b, CD68, CD14, CD163, and HLA-DR) in pre-treatment (black bars) and IT injection site (grey bars) were depicted.

### Supplemental Reference

1. Tumei PC, Harview CL, Yearley JH, Shintaku IP, Taylor EJM, Robert L, et al. PD-1 blockade induces responses by inhibiting adaptive immune resistance. *Nature*. 2014 Nov 27;515(7528):568–71.
