# Supplementary material
Source: PubMed Central journal article supplement (PMC5712264)

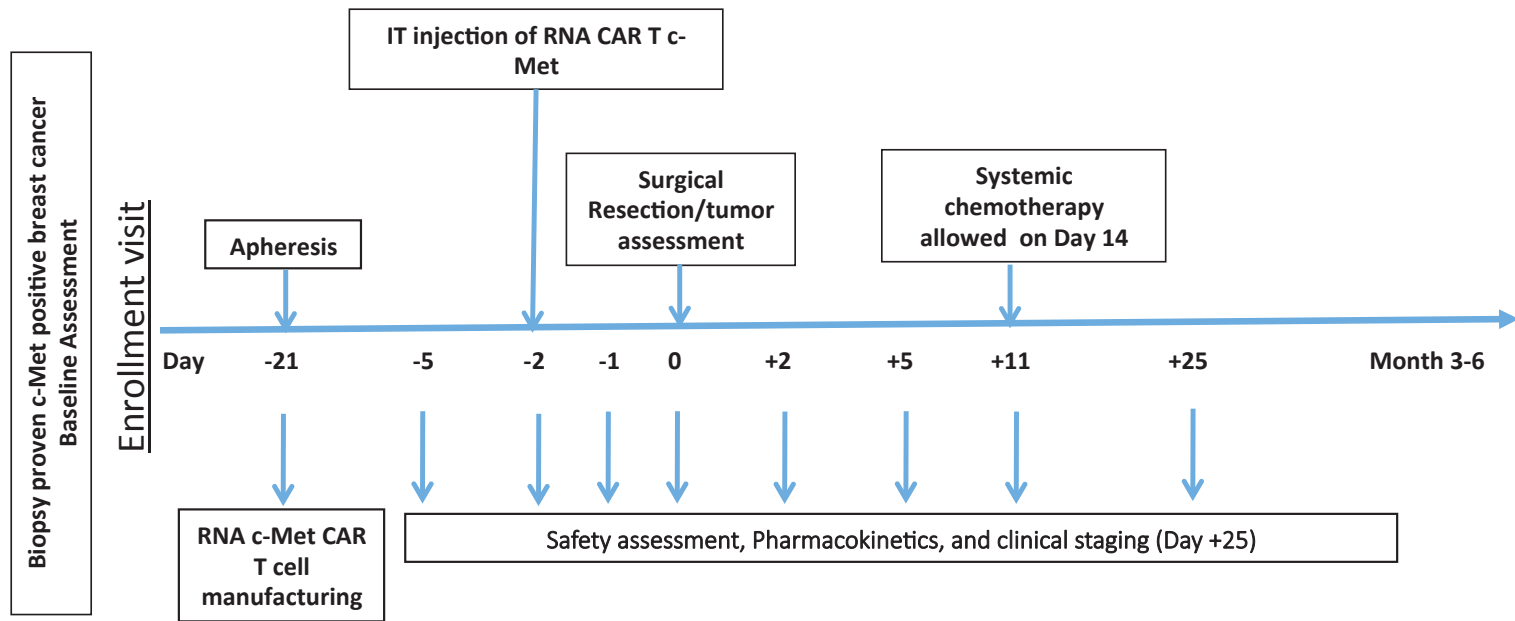

Figure S1

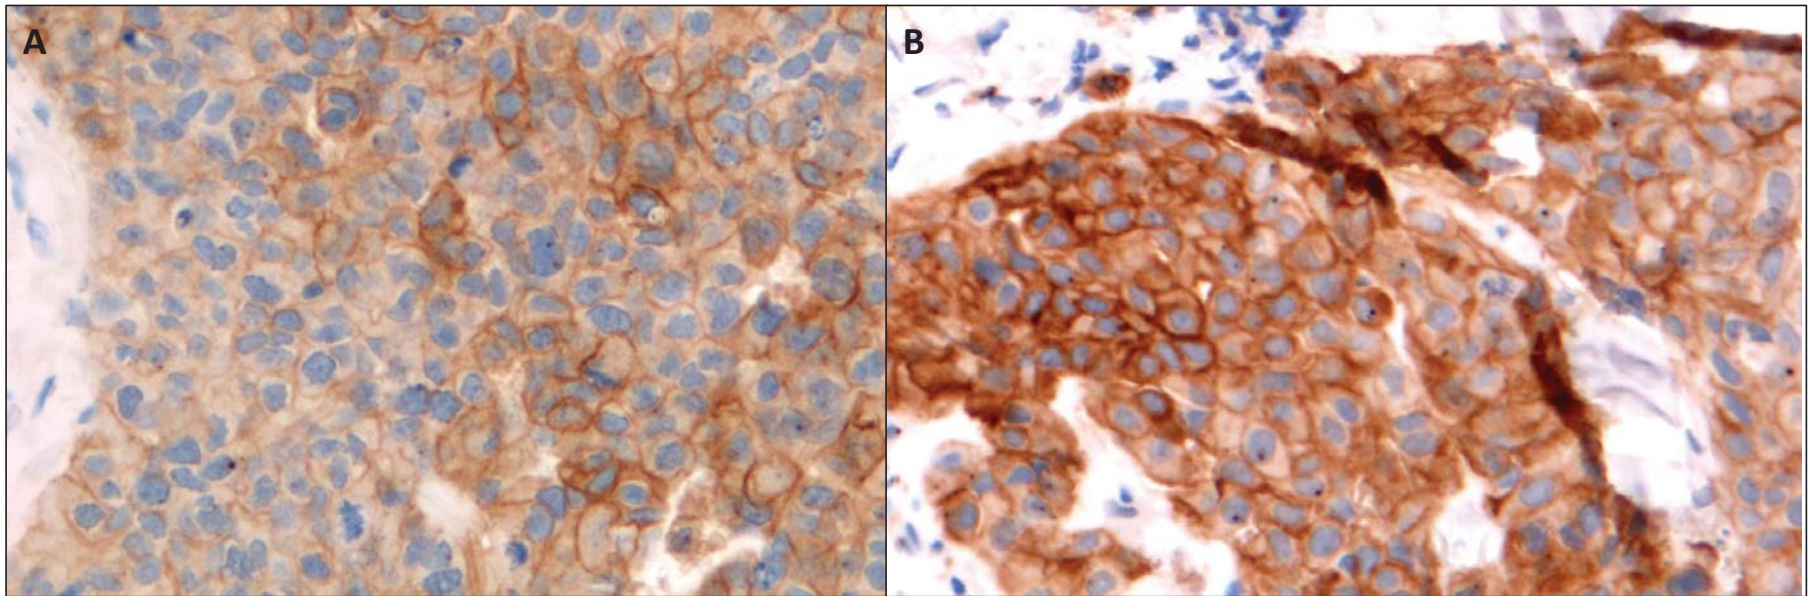

Figure S2

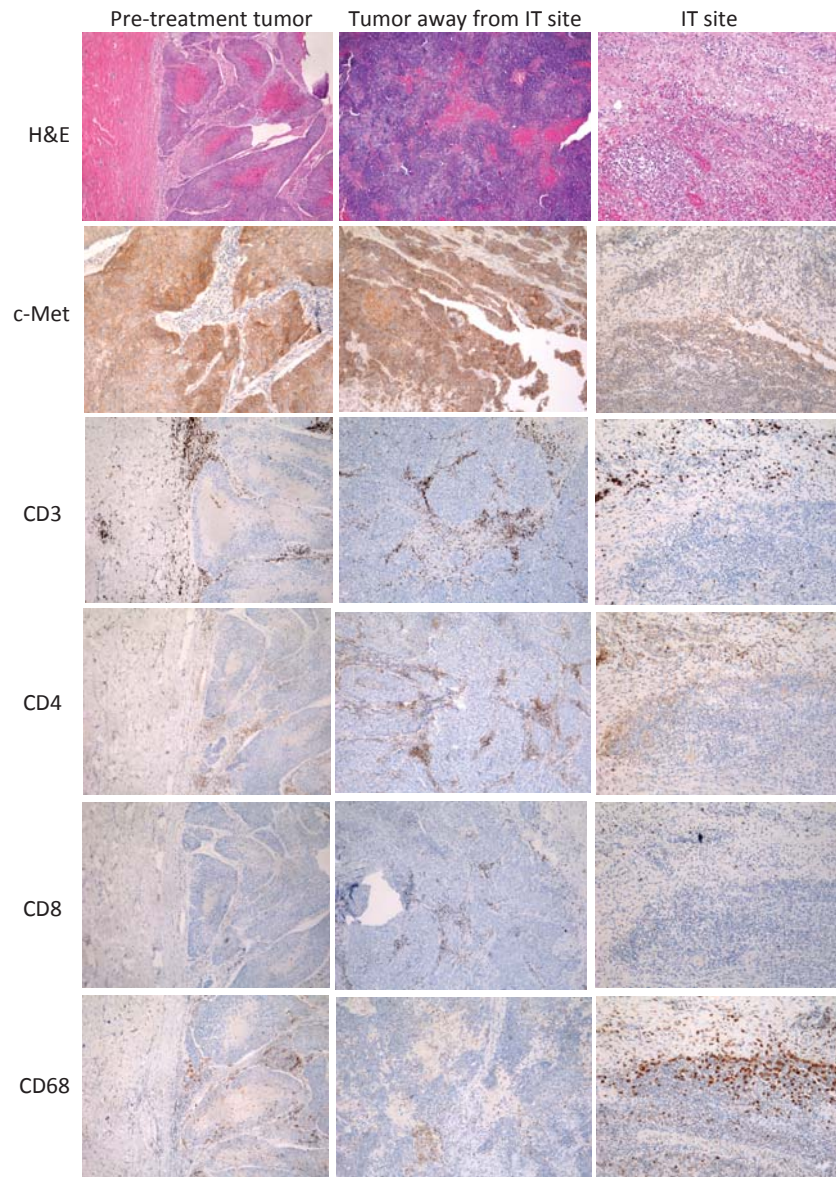

Figure S3



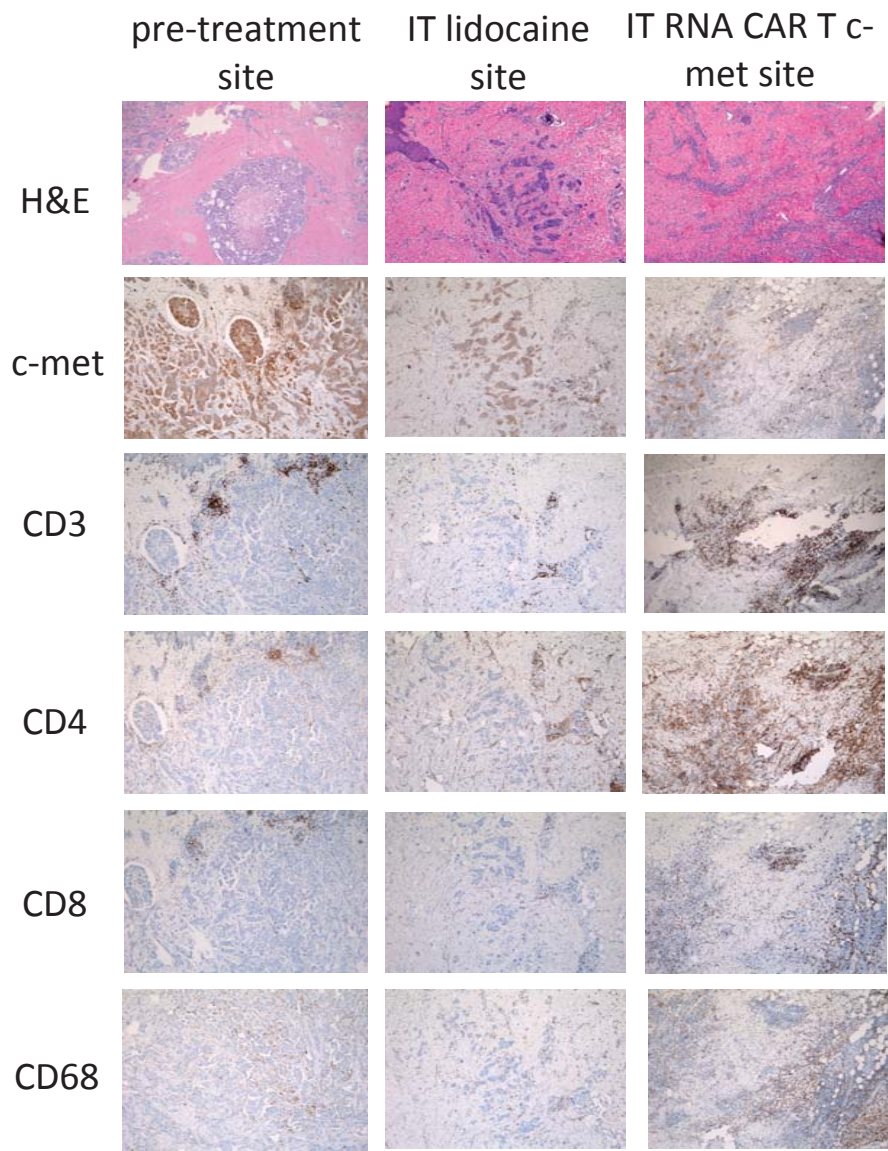

Fig. S4

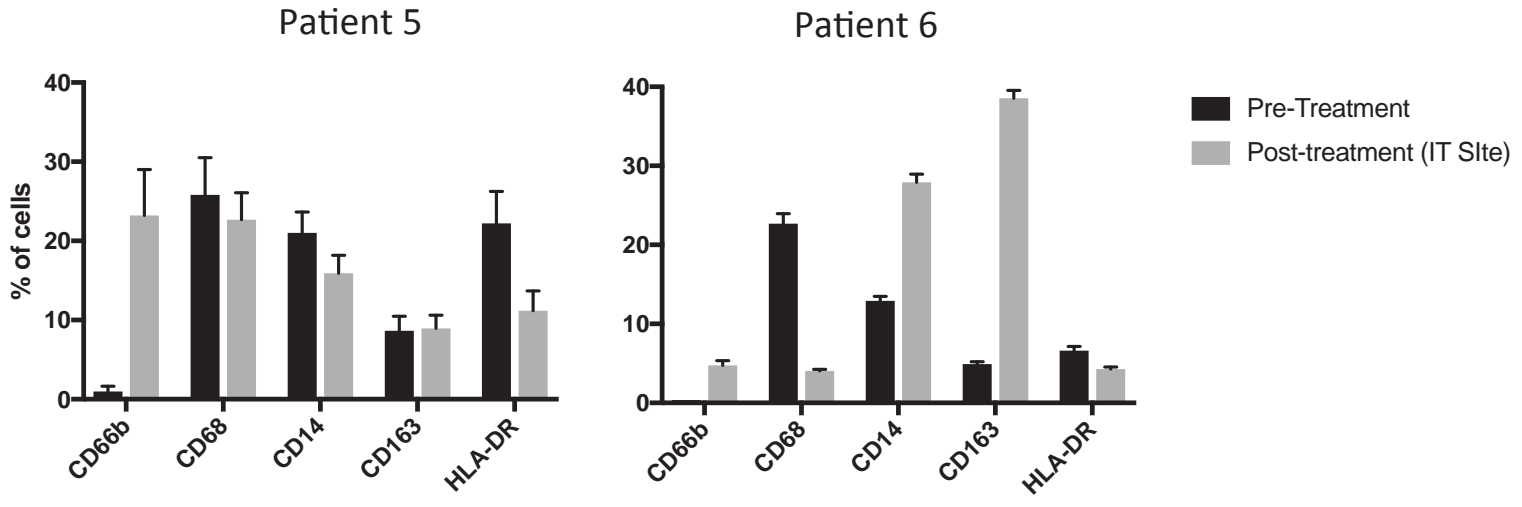

Fig. S5

Supplement: NIHMS915912-supplement-1.pdf [file NIHMS915912-supplement-1.pdf]
